# Supplementary material for: The application of surface enhanced Raman scattering to the detection of asphaltic petroleum in sediment extracts: deconvolving three component-mixtures using look-up tables of entire surface enhanced Raman spectra
Source: Royal Society of Chemistry journal article supplement (doi:10.1039/c9ay01859j), 2019-01-01
Supplement: c9ay01859j1.zip [file c9ay01859j1.zip]

Example_Processing_Algorythm_ShareN.R

gmi415

Wed Aug 28 11:08:15 2019

#This is an implimentation of the deconvolution procedure described in Bowden and Taylor
#To use the document, open it in R, check directory structure and run
#clean environment and get packages
rm(list=ls())
library(ggplot2)

## Warning: package 'ggplot2' was built under R version 3.4.4

library(grid)
library(plyr)

## Warning: package 'plyr' was built under R version 3.4.4

library(DescTools)

## Warning: package 'DescTools' was built under R version 3.4.3

#Normalising, rescaling and end point finding functions
rescale_01 <- function(x){
# Normalizes a vector to [0,1]
 minr<-min(x)
 maxr<-max(x)
 (x - minr) / (maxr - minr)
}
#min and max finders
topMinUsingPartialSort <- function(x, N) {
 N <- min(N, length(x))
 x[x <= sort(x, partial=N)[N]][1:N]
}
topMaxUsingPartialSort <- function(x, N) {
 N <- min(N, length(x))
 x[x >= -sort(-x, partial=N)[N]][1:N]
}

#name of file to process
name_of_file<-"SP_37.txt"

#Point at directory containing samples
setwd("C:/Users/gmi415/Documents/Brough_deconvolve/Example_SERS_DATA")

#Load sample and remove header etc.and data out of range of interest
#Note that the read table function will have to be adjusted for different file formats
BR2<-read.table((file=paste(name_of_file)), sep = ";", skip= 91)
BR2n<-data.frame(BR2[,4], BR2[,8])
colnames(BR2n)<-c("ramnum","V2")
BR2n<-subset(BR2n, ramnum > 1200| ramnum < 1800)
BR2n<-subset(BR2n, ramnum >= 1200 & ramnum <= 1800)
BR2n<-as.data.frame(supsmu(BR2n$ramnum, BR2n$V2, span = "0.03"))
colnames(BR2n)<-c("ramnum","V2")

#baseline (find end points and substract a straightline)
minl<-subset(BR2n, V2 == min(BR2n[1:30,2]))
minh<-subset(BR2n, V2 == min(BR2n[(nrow(BR2n)-20):nrow(BR2n),2]))
minl[,2]<- mean(topMinUsingPartialSort(BR2n[1:30,2], 10))
minh[,2]<-mean(topMaxUsingPartialSort(BR2n[(nrow(BR2n)-20):nrow(BR2n),2], 10))
baslinepoints<-rbind(minl,minh)
linearMod <- lm(V2 ~ ramnum, data=baslinepoints)
baseline<-predict(linearMod, BR2n)
BR2n[,3]<-baseline
BR2n$Spec<-(BR2n[,2]-baseline)
BR2n[BR2n<0]<-0

#find height for calibration - compare before and after
Gband<-(BR2n[which(BR2n$ramnum > 1570 & BR2n$ramnum < 1585), ])
Gheight<-max(Gband$Spec)

#rescale, smooth to remove outliers and interporlate
BR2nn<-as.data.frame(supsmu(BR2n$ramnum, BR2n$Spec, span = "0.03"))
samplespectratable<-data.frame(ramnum = 1200:1799)
InterpBR<-as.data.frame(approx(BR2nn[,1], BR2nn[,2], xout= samplespectratable$ramnum))
InterpBR[is.na(InterpBR)]=min(InterpBR[,2], na.rm = TRUE)
InterpBR$Spec<-rescale_01(InterpBR$y)


#Construct Look Up Table Number 1 (asphaltic Petroleum and Humic Acid)
peat<-read.table(file ="peatextract.dat")
silasph<-read.table(file ="siljianaspah.dat")

#smooth and tidyspectra (use a smoothing function that will also interpolate)
peat[,7:8]<-as.data.frame(supsmu(peat[,1], peat[,2], span = "0.03"))
peat[,9]<-rescale_01(peat[,8])
silasph[,6:7]<-as.data.frame(supsmu(silasph[,1], silasph[,2], span = "0.02"))
silasph[,8]<-rescale_01(silasph[,7])


#build table of end members
spectratable<-data.frame(ramnum = 1008:1799)
resampeat<-approx(peat[,1], peat[,9], xout= spectratable$ramnum)
resamasph<-approx(silasph[,1], silasph[,8], xout= spectratable$ramnum)
spectratable$peat<-resampeat$y
spectratable$asph<-resamasph$y

#calcuculate lookup table 1
for (f in 1:100){
 spectratable[,3+f]<-((f/100)*spectratable$peat)+((100-f)/100)*spectratable$asph
}

#subset the table for a quikcer/easier life
#subset the spectratable from 1200 to 1799 (600 rows)
spectratable<-subset(spectratable, ramnum > 1199 & ramnum < 1800)
eval <-as.data.frame(c(1:(ncol(spectratable)-3)))


#look up part fro asph/peat %
#nn is the result for the amount of peat/humic acid or peat that best explains asphaltene
for (j in 1:nrow(eval)){
 eval[j,2] = cor(spectratable[,j+3],InterpBR$Spec,"complete.obs")
}
colnames(eval)<-c("percentPeat","Rcor")
eval<-arrange(eval,(-Rcor),(percentPeat))
eval[1,]

## percentPeat Rcor
## 1 2 0.6611753

nn<-eval[1,1]


#Construct Look Up Table Number 2 (asphaltic Petroleum and Humic Acid + pigment)
#T4py is a mixture of of beta carotrene and c-phycocyanin spectra
T4py<-read.table(file ="tetrapyrolemodel3.txt")

#smooth and resample
T4py[,3:4]<-as.data.frame(supsmu(T4py[,1], T4py[,2], span = "0.03"))
T4py[,5]<-rescale_01(T4py[,4])
nspectratable<-data.frame(ramnum = 1200:1799)
resamT4py<-approx(T4py[,1], T4py[,5], xout= spectratable$ramnum)


procT4py<-data.frame(ramnum = 1008:1799)
procT4py<-subset(procT4py, ramnum >= 1200)
procT4py$T4pyspecl<-rescale_01(resamT4py$y)


#baseline removal for reference pigment - this can be skipped
T4minl<-subset(procT4py, T4pyspecl == min(procT4py[1:30,2]))
T4minh<-subset(procT4py, T4pyspecl == min(procT4py[(nrow(procT4py)-20):nrow(procT4py),2]))
T4baslinepoints<-rbind(T4minl,T4minh)
linearMod <- lm(T4pyspecl ~ ramnum, data=T4baslinepoints)
baseline<-predict(linearMod, procT4py)
procT4py[,3]<-baseline
procT4py$T4pyspecl<-procT4py$T4pyspecl-procT4py$V3

#tetrapryole mix
for (g in 1:101){
 nspectratable[,g+1]<-((g/100)*spectratable[,nn+1])+((100-g)/100)*procT4py$T4pyspecl
}

#look up part fro % bb
neval <-as.data.frame(c(1:(ncol(nspectratable)-1)))
for (i in 1:nrow(neval)){
 neval[i,2] = cor(nspectratable[,i+1],InterpBR$Spec,"complete.obs")
}
colnames(neval)<-c("percentbb","Rcor")
neval<-arrange(neval,(-Rcor),(percentbb))
neval[1,]

## percentbb Rcor
## 1 53 0.6893653

mn<-neval[1,1]

#final fractions calculated
BB<-1-(neval$percentbb[1]/100)
Humic<-(1-BB)*(eval$percentPeat[1]/100)
Asph<-(1-BB)*(1-(eval$percentPeat[1]/100))
Chksum<-BB+Humic+Asph

#gather results
ReturnedData<-c(Asph, Humic, BB, Chksum, eval[1,2], neval[1,2],
 Gheight, Gheight*Asph)
ReturnedData<-lapply(as.numeric(ReturnedData), round, digits = 2)
ReturnedData<-c(paste(name_of_file),ReturnedData)
results<-as.data.frame(rbind(ReturnedData))
colnames(results)<-c("name", "Asphaltene","Humic Acid","pigments","Chksum","Asph. cor","Pig cor.",
 "G-height","corrected G-height")
results<-unlist(results)
results<-as.data.frame(results)

#write as a text file with the an altered file name
write.table(results, file = paste("output",name_of_file), col.names = TRUE,
 row.names = TRUE)
